# Supplementary material for: Cell-Type Specific Metabolic Response of Cancer Cells to Curcumin
Source: MDPI journal article supplement (doi:10.3390/ijms21051661), 2020-02-28
Supplement: s1 [file s1]

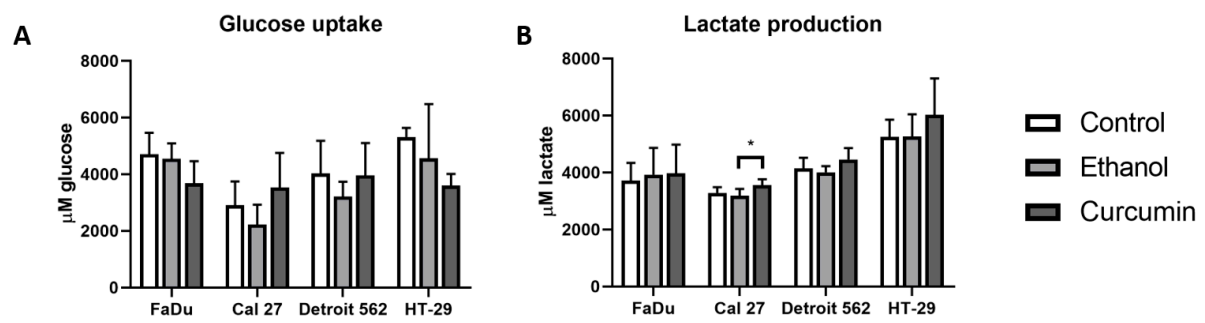

**Figure S1.** Specific cellular response with respect to the studied metabolic parameters. Glucose uptake (A) and lactate production (B). A one-way ANOVA with Tukey post-hoc test. \*  $p < 0.05$ ; \*\*  $p < 0.01$ ; \*\*\*  $p < 0.001$ ; \*\*\*\*  $p < 0.0001$ .
